## RETRACTION

# Retraction: Whale jaw joint is a shock absorber

**Alexander J. Werth and Haruka Ito**

The authors are retracting *Journal of Experimental Biology* (2020) **223**, jeb211904 (doi:10.1242/jeb.211904).

The authors no longer have full confidence in their results because of inconsistencies in data collection. Technical issues led to unreliable data recording, which then led to erroneous calculations that affected the results published in the paper.

As the paper was featured in the Inside JEB section, the associated Inside JEB article has also been retracted (doi:10.1242/jeb.230771).

The authors apologise to readers for any inconvenience caused.

## SHORT COMMUNICATION

## Whale jaw joint is a shock absorber

Alexander J. Werth<sup>1,\*</sup> and Haruka Ito<sup>2</sup>

## ABSTRACT

The non-synovial temporomandibular jaw joint of rorqual whales is presumed to withstand intense stresses when huge volumes of water are engulfed during lunge feeding. Examination and manipulation of temporomandibular joints (TMJs) in fresh carcasses, plus CT scans and field/lab mechanical testing of excised tissue blocks, reveals that the TMJ's fibrocartilage pad fully and quickly rebounds after shrinking by 68–88% in compression (by axis) and stretching 176–230%. It is more extensible along the mediolateral axis and less extensible dorsoventrally, but mostly isotropic, with collagen and elastin fibers running in all directions. The rorqual TMJ pad compresses as gape increases. Its stiffness is hypothesized to damp acceleration, whereas its elasticity is hypothesized to absorb shock during engulfment, allow for rotation or other jaw motion during gape opening/closure, and aid in returning jaws to their closed position during filtration via elastic recoil with conversion of stored potential energy into kinetic energy.

**KEY WORDS:** Cetacea, Mysticete, Temporomandibular, TMJ, Morphology, Biomechanics, Elasticity

## INTRODUCTION

Rorquals (groove-throated whales, *Balaenopteridae*) include humpback, fin and blue whales, the largest animals that have ever lived. During ram-propelled lunge feeding on schooling fish and zooplankton, the jaws open wide to engulf massive volumes of prey-laden water, >70 m<sup>3</sup> in blue whales (*Balaenoptera musculus*; Goldbogen et al., 2012) and 30–40 m<sup>3</sup> in humpbacks (*Megaptera novaeangliae*; Simon et al., 2012). Even in the smallest rorqual species, northern and Antarctic minke whales (*Balaenoptera acutorostrata*, *Balaenoptera bonaerensis*), the engulfed water volume can be conservatively estimated at 3–6 m<sup>3</sup> based on scaling of oral and total body size (Werth et al., 2018). By powering whales' forward locomotion, the flukes and tail stock musculature develop the power necessary for lunge feeding (Goldbogen et al., 2017), but the mandibles and temporomandibular joint (TMJ) presumably bear the brunt of the enormous drag force generated when gape opens to accommodate water filling the greatly expanded oral pouch. Although no bite forces are encountered and the TMJ lies at the fulcrum of jaw movement, these mandibular joint stresses likely pose a formidable challenge.

Whereas bowhead and right whales (*Balaenidae*) possess a typically mammalian fluid-filled synovial TMJ (Beauregard, 1882; Lambertsen et al., 1989), the rorqual TMJ has a large fibrocartilage pad but no joint capsule, synovial membrane or discrete articulating disc of hyaline

cartilage (Brodie, 2001; Bouetel, 2005). The temporal glenoid cavity and head of the mandibular condyle are covered with smooth hyaline cartilage, but there is no cartilage between the fibrocartilage pad and the skull's mandibular fossa (Werth and Ito, 2017). The gray whale's (*Eschrichtiidae*) intermediate TMJ has a vestigial joint cavity yet also a rudimentary fibrocartilage pad (El Adli and Lallier, 2015). Rorqual TMJ anatomy has long attracted attention (Cate and MacAlister, 1868; Beauregard, 1882; Benzon, 1882; Schulte, 1916) but no functional investigation has been published to date.

However, several studies (Brodie, 1977; Pivorunas, 1977; Lambertsen et al., 1989; Lambertsen et al., 1995; Potvin et al., 2010; Goldbogen et al., 2017) concluded that the rorqual TMJ withstands intense forces as jaws are fully abducted during engulfment and to keep jaws closed (adducted) during rapid swimming. Further research has documented remarkable biomechanical properties, especially extreme elasticity or flexibility, of various rorqual oral tissues related to lunge feeding, including the ventral groove blubber or VGB (Orton and Brodie, 1987; Shadwick et al., 2013), nerves (Pyenson et al., 2013; Vogl et al., 2015; Lillie et al., 2017), blood vessels (Gosline and Shadwick, 1996; Lillie et al., 2013), sublingual fascia (Werth et al., 2019) and baleen (Werth et al., 2018b). This study focuses on the biomechanical properties of the rorqual TMJ, in particular its response to compressive, tensile and shear stresses; histological study and investigation of joint motion are ongoing. We hypothesized, based on the irregular array of collagen and elastin fibers in the TMJ's fibrocartilage pad, that it might be mechanically anisotropic and show high levels of elasticity, particularly along specific orthogonal axes.

## MATERIALS AND METHODS

We examined the TMJ of seven deceased minke whale specimens, including four *B. acutorostrata* Lacépède 1804 (two adult: female 6.02 m body length, NEAq.MH.87.586.Ba stranded normal/fresh Code 2 at Truro, MA, USA; and female 4.6 m, 06-030.18.786 stranded normal/fresh Code 2 at Corolla, NC, USA; one juvenile: female 3.4 m stranded normal/fresh Code 2 at Virginia Beach, VA, USA; and one fetal: female 1.46 m, NEAq.MH.88.Bxx.Ba, mother stranded normal/fresh Code 2 at Cape Cod, MA, USA), and three fetal *B. bonaerensis* Burmeister 1867 (all ICR JARPA: male 1.45 m 03/04 318F, male 2.05 m 03/04 402F, female 2.09 m 05/06 486F). We examined/tested TMJs of three fin whales, *Balaenoptera physalus* (Linnaeus 1758) (two adult: male 17.68 m 24.7.F14.054, female 20.46 m 24.7.H9.F14.055; and one fetal: female 3.25 m 24.7.H8.F14.048F; all normal/fresh Code 2 at Hvalfjörður, Iceland). We dissected three additional rorqual TMJs (one sei whale, *Balaenoptera borealis* Lesson 1828; two humpback, *Megaptera novaeangliae* Borowski 1781) and performed field biomechanical tests on one of the humpback whales.

All specimens were dissected according to applicable statutes; no tissues were imported. For load cycle testing, larger cube-shaped tissue samples 10 cm on each side (1000 cm<sup>3</sup>) (Fig. 1) were excised from the left and right TMJ pad of each non-fetal northern minke whale, with a smaller cube 5 cm on each side (125 cm<sup>3</sup>) excised

<sup>1</sup>Department of Biology, Hampden-Sydney College, Hampden-Sydney, VA 23943 USA. <sup>2</sup>National Research Institute of Fisheries Science, Japan Fisheries Research and Education Agency, Yokohama, Kanagawa 236-8648, Japan.

\*Author for correspondence (awerth@hsc.edu)

© A.J.W., 0000-0002-7777-478X

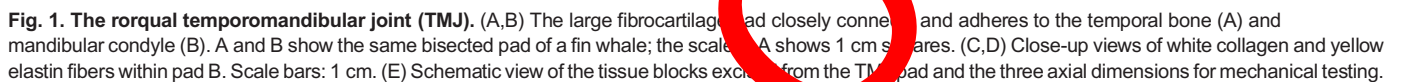

For laboratory material testing, thawed 125 cm<sup>3</sup> tissue blocks of the northern minke whales were initially tested for uniaxial strength

Next, each of the seven larger (1000 cm<sup>3</sup> adult or 125 cm<sup>3</sup> fetal) tissue blocks was load tested uniaxially and sequentially in three dimensions (anteroposterior, dorsoventral and mediolateral, with  $N=20$  loading/unloading cycles along each axis) to 95% of the same maximal compressive and tensile strengths determined during the earlier failure testing. As with the strength testing, both stress and strain were recorded with the Mesur<sup>TM</sup>Gauge software and strain was additionally recorded with a digital micrometer physically attached and data-linked to the testing machine. With  $N=20$  loading/unloading cycles for all seven tissue blocks, the combined total was  $N=140$  for compressive and  $N=140$  for tensile tests along each of the three orthogonal axes. However, because the fetal tissue sample was smaller in size and came from a much younger (prenatal) animal, its results were not included in the pooled load cycle data (Fig. 2), which included  $N=360$

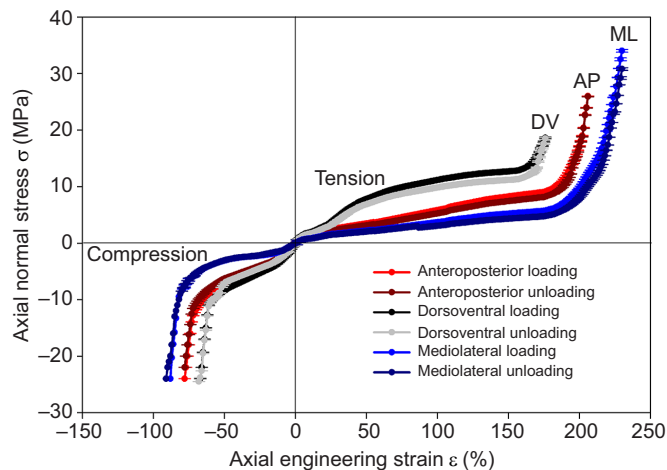

**Fig. 2. Loading profile of the TMJ.** Stress–strain curves combined for left and right TMJ pads from 3 adult/subadult northern minke whale specimens (6 pads total) for uniaxial testing in all 3 dimensions during loading ( $N=120$  total tests along each axis) and unloading ( $N=120$  total tests along each axis) (mean $\pm$ s.d.). The rostral TMJ is highly elastic, especially in mediolateral compression/tension, and least elastic in dorsoventral compression/tension. AP, anteroposterior; DV, dorsoventral; ML, mediolateral.

compressive and  $N=360$  tensile tests (20 per sample $\times$ 6 samples $\times$ 3 axes), so that  $N=720$  total load cycles.

For the other species, TMJ fibrocartilage pads were dissected and examined in the field, with simpler biomechanical testing of fresh tissue blocks from fin and humpback whales. Samples of these species were not removed and frozen for lab testing. Whole TMJ fibrocartilage pads and excised  $10\times10\times10$  cm blocks ( $1000\text{ cm}^3$ , equivalent to those from minke whales, and also cut with a large straight knife as pads were held flat against lucite sheets) were tested in compression with a Mark-10 M4-200 force gauge (Capeague), pushing tissue between flat plates, and in tension with a Pesola Macroline spring scale (Schindellegi, Switzerland) displaced in N, again testing  $N=20$  along each orthogonal axis. Maximal axial compressive and tensile strength was not determined in these field tests, but the load cycling was performed to 95% of maximal (failure) compression and tension as determined by the earlier testing on northern minke whale tissue samples. Additional field studies employed either slow or rapidly applied forces precisely maintained at 50 N to determine whether the TMJ pad material might be viscoelastic or if recovery was otherwise time limited such that it could aid in damping acceleration or absorbing and storing energy. Field and lab (mechanical strength and load cycling) results were analyzed via  $t$ -tests to determine whether data (e.g. from different specimens, tests and species) were statistically significant.

## RESULTS AND DISCUSSION

In all specimens examined, the TMJ was a heterogeneous matrix of fibrocartilage including abundant white collagen and yellow elastin fibers (Fig. 1). However, no discernible differences in pad regions could be detected *in situ* or in excised samples. There were scattered fibroblasts, adipocytes and regions of what appeared to be highly hydrated chondrocytes. The entire fibrocartilage pad was approximately  $0.007\text{ m}^3$  in volume in a 6 m minke whale ( $0.136\text{ m}^3$  in a 20 m fin whale). The pad was flexible to the touch and easily deformed 10–15 cm: when pushed, pulled or subjected to shear ( $\leq 70$  N), the tissue resumed its original form within  $1.5\pm 0.3$  s (mean $\pm$ s.d.). Manipulation of fresh carcasses showed flexible jaws cannot easily be misaligned or disarticulated unless tissues are cut. When

manually opened, jaws tended to close on their own (within 4 s in minke whales), although this could be due to many factors or non-TMJ tissues. Mandibular rotation (medial roll and lateral yaw) accompanied abduction; the pad twisted but easily resumed its original form.

Strength testing of the minke whale tissue revealed maximal loading of 29 N in compression (mean $\pm$ s.d.  $29.2\pm 0.2$  N dorsoventral,  $29.4\pm 0.2$  N anteroposterior,  $29.5\pm 0.3$  N mediolateral, all  $N=8$ ) and 22–40 N in tension ( $22.3\pm 0.3$  N dorsoventral,  $29.6\pm 0.3$  N anteroposterior,  $39.7\pm 0.3$  N mediolateral). Loading and unloading profiles (Fig. 2) indicated a soft, highly elastic tissue supporting the hypothesized rostral TMJ flexibility. When compressed, each block shrank 70–90% along any axis with application of 24–25 MPa. When pulled under tensile forces of 19–35 MPa, the block increased by 176–224% of their original size (Fig. 2). Loading and unloading curves were similar, revealing little hysteresis (Fig. 2). There was close agreement of force gauge and micrometer displacement data ( $P=0.92$ ). Field tests indicated no significant difference ( $P=0.81$ ) between fresh TMJ tissue tested immediately postmortem or frozen and thawed for later laboratory testing. This elasticity range is comparable to other whale oral tissues noted above, and accords with field data on fresh minke whale TMJ pads, which also demonstrated compressive strains of 70–80% (mean $\pm$ s.d.  $68.4\pm 1.3\%$ ,  $N=48$ ) and tensile strains of 120–166% ( $129.7\pm 4.1\%$ ,  $N=48$ ); data from the single humpback TMJ pad showed even greater elasticity (mean $\pm$ s.d. compressive strain  $73.2\pm 3.4\%$ , tensile strain  $138.6\pm 4.8\%$ ,  $N=25$ ). Species differences between TMJ pads of minke versus fin ( $P=0.32$ ) and humpback ( $P=0.56$ ) whales were not significant. No differences were found between sex or size/age class, except that the fetal minke whale TMJ pad was substantially more elastic than adult tissue ( $P=0.09$ ), perhaps because mature collagen typically develops cross-links or from other age-related histological change.

Our results suggest the fibrocartilage pad's mechanical anisotropy is limited (Fig. 2), as stress/strain vary little between axes ( $P=0.51$ ). The pad was least elastic in the dorsoventral plane, stretching 166% under tension (with mean $\pm$ s.d.  $18.6\pm 0.13$  MPa,  $N=120$  for all trials) and  $-68\%$  under compression (with  $24.5\pm 0.19$  MPa). It was most elastic in the mediolateral plane, where it stretched 224% under tension (with  $35.2\pm 0.09$  MPa) and  $-88\%$  under compression ( $24\pm 0.07$  MPa). Stretching was intermediate in the anteroposterior plane, at 202% (with  $26\pm 0.21$  MPa) in tension and  $-78\%$  (with  $24\pm 0.17$  MPa) in compression.

Preliminary histology results did not indicate obvious differences in axial fiber arrangement, yet suggested slightly more elastin fibers (perhaps 15–20% more) running anteroposteriorly and dorsoventrally. We presume the strong collagen fibers mainly resist tension and the yellow elastin fibers aid in recovery from tensile and compressive loading, as in typical fibrocartilage (Benjamin and Ralphs, 1998) as well as other heavily loaded cetacean tissues that show high stiffness and elasticity (Gosline and Shadwick, 1996; Shadwick, 1999). Despite its close proximity to the ear, the fibrocartilage pad is unlikely to play a role in sound transmission, although its acoustic properties should be analyzed.

How these triaxial stress/strain results relate to jaw movements is uncertain. However, dissected TMJs enabled us to observe fibrocartilage pad alteration during jaw manipulation. Further, CT scans (Fig. 3) yielded internal views showing osteological relationships and dimensions plus soft tissue deformation during jaw abduction/adduction. The pad is not a wholly constant-volume structure but its deformation largely follows a simple scheme. As gape increases from zero (mouth closed) to full (opened), the pad shortens overall but appears to become compressed mainly in its ventral portion, whereas its dorsal portion is tensed. At the same



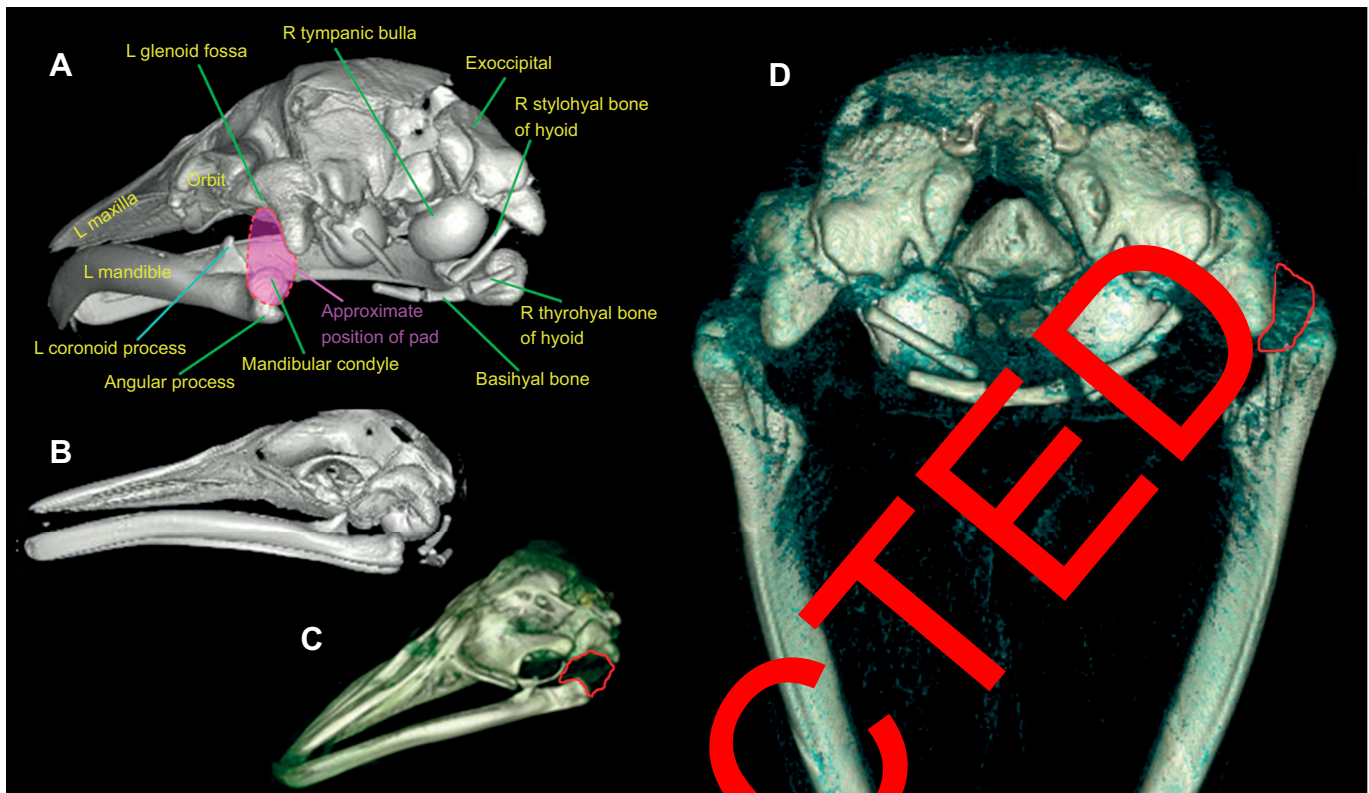

**Fig. 3. CT scans of Antarctic minke whale head.** (A) Posterolateral, (B) lateral, (C) dorsal and (D) posterior (full gape) views show bony elements (cranium/mandibles/hyoid) and soft tissues including the TMJ pad [approximately dashed red oval in A and outlined in red in C (left pad) and D (right pad)]. With full gape (jaw abduction, D), the pad becomes compressed anteroposteriorly and greatly expanded mediolaterally.

time, the anteroposteriorly compressed pad extends mediolaterally (by about 40–60%) and to a lesser degree dorsoventrally (10–15%). Although uniaxial testing along individual axes yields interesting and potentially useful controlled data, we cannot replicate simultaneous loading along three axes, as is most certainly the case *in vivo*.

Our results, including equivocal results of compressive/tensile tests conducted with varying speeds, suggest the mandibular fibrocartilage pad could act like an articular shock-absorbing cushion whose stiffness damps acceleration, viscous friction and deformable elasticity absorb shock during prey engulfment. The pad could allow for mandibular rotation and displacement during gape opening/closure to greatly expand buccal volume, and could aid in returning jaws to closed position during filtration via elastic recoil with conversion of stored potential energy into kinetic energy. The role during rapid lung-feeding of rorquals' capacious oral pouch and elastic, accordion-like throat pleats (Pivorunas, 1977; Orton and Pridie, 1983; Goldbogen, 2010; Shadwick et al., 2013) depends on the jaw joint's ability to open widely and to close against huge loading forces generated by the massive volume of engulfed water and ensuing drag (Lambertsen, 1983; Arnold et al., 2005; Potvin et al., 2011). Previous studies (Lambertsen et al., 1995; Lambertsen and Hintikka, 2004; Arnold et al., 2005; Goldbogen et al., 2011) concluded that the fully adducted (closed) jaw forms some sort of oral seal which, when combined with other oral adaptations, enables rorquals to stabilize jaws and control gape opening/closure while potentially minimizing energetic costs. The loose, flexible TMJ and mandibular symphysis and consequent wide gape (Fitzgerald, 2012; Pyenson et al., 2012) may have fueled rorquals' trophic success and consequent adaptive radiation (Kimura, 2002; Thewissen, 2014; Marx et al., 2016; Goldbogen et al., 2019).

#### Acknowledgements

For field access we are grateful to Kristjan Loftsson and staff of Hvalur in Iceland, Dr Y. Fujise at the Institute of Cetacean Research in Japan, and Erin Fougères, Bill McLellan and participants/organizers of the NOAA/NMFS Marine Mammal Stranding Network of USA. For ideas and assistance, we thank colleagues including Bob Shadwick, Jeremy Goldbogen, Nick Pyenson, Jean Potvin, Margo Lillie, Wayne Vogl, Tom Ford, Pierre-Henry Fontaine, Keiichi Ueda, Seiji Otani, Tatsuya Isoda, Hiroshi Sawamura and Hiroto Ichishima.

#### Competing interests

The authors declare no competing or financial interests.

#### Author contributions

Conceptualization: A.J.W., H.I.; Methodology: A.J.W., H.I.; Validation: A.J.W., H.I.; Formal analysis: A.J.W., H.I.; Investigation: A.J.W., H.I.; Resources: A.J.W., H.I.; Data curation: A.J.W.; Writing - original draft: A.J.W.; Writing - review & editing: A.J.W., H.I.; Visualization: A.J.W., H.I.; Supervision: A.J.W.; Project administration: A.J.W., H.I.

#### Funding

A.J.W. was funded by Hampden-Sydney College faculty grants and Trinkle research funds.

#### References

- Arnold, P. W., Birtles, R. A., Soltzick, S., Matthews, M. and Dunstan, A. (2005). Gulping behaviour in rorqual whales: underwater observations and functional interpretation. *Mem. Queensland Mus.* **51**, 309–332.
- Beauregard, H. (1882). L'articulation temporomaxillaire chez les Cetacés. *J. d'Anat. et la Physiol.* **18**, 16–26.
- Beneden, P. J. (1882). Sur l'articulation temporomaxillaire chez les Cetacés. *Arch. de Biol.* **3**, 669–673.
- Benjamin, M. and Ralphs, J. R. (1998). Fibrocartilage in tendons and ligaments: an adaptation to compressive load. *J. Anat.* **193**, 481–494. doi:10.1046/j.1469-7580.1998.19340481.x
- Bouetel, V. (2005). Phylogenetic implications of skull structure and feeding behavior in baleenopterids (Cetacea, Mysticeti). *J. Mamm.* **86**, 139–146. doi:10.1644/1545-1542(2005)086<0139:PIOSSA>2.0.CO;2

- Brodie, P. F.** (1977). Form, function, and energetics of Cetacea: a discussion. In *Functional Anatomy of Marine Mammals* (ed. R. J. Harrison), pp. 45–58. New York: Academic Press.
- Brodie, P. F.** (2001). Feeding mechanics of rorquals *Balaenoptera* sp. In *Secondary Adaptations of Tetrapods to Life in Water* (ed. J. M. Mazin and V. de Buffrénil), pp. 345–352. Munich: Verlag.
- Carte, A. M. and Macalister, A.** (1868). On the anatomy of *Balaenoptera rostrata*. *Phil. Trans. Roy. Soc. Lond.* **185**, 201–261. doi:10.1098/rstl.1868.0009
- El Adli, J. J. and Deméré, T. A.** (2015). On the anatomy of the temporomandibular joint and the muscles that act upon it: observations on the gray whale, *Eschrichtius robustus*. *Anat. Rec.* **298**, 680–690. doi:10.1002/ar.23109
- Fitzgerald, E. M. G.** (2012). Archaeocete-like jaws in a baleen whale. *Biol. Lett.* **8**, 94–96. doi:10.1098/rsbl.2011.0690
- Goldbogen, J. A.** (2010). The ultimate mouthful: lunge feeding in rorqual whales. *Am. Sci.* **98**, 124–131. doi:10.1511/2010.83.124
- Goldbogen, J. A., Calambokidis, J., Oleson, E., Pyenson, N. D., Schorr, G. and Shadwick, R. E.** (2011). Mechanics, hydrodynamics and energetics of blue whale lunge feeding: efficiency dependence on krill density. *J. Exp. Biol.* **214**, 131–146. doi:10.1242/jeb.048157
- Goldbogen, J. A., Calambokidis, J., Croll, D. A., McKenna, M. F., Oleson, E., Potvin, J., Pyenson, N. D., Schorr, G., Shadwick, R. E. and Tershy, B. R.** (2012). Scaling of lunge-feeding performance in rorqual whales: mass-specific energy expenditure increases with body size and progressively limits diving capacity. *Func. Ecol.* **26**, 216–226. doi:10.1111/j.1365-2435.2011.01905.x
- Goldbogen, J. A., Cade, D. E., Calambokidis, J., Friedlaender, A. S., Potvin, J., Segre, P. S. and Werth, A. J.** (2017). How baleen whales feed: the biomechanics of engulfment and filtration. *Ann. Rev. Mar. Sci.* **9**, 367–386. doi:10.1146/annurev-marine-122414-033905
- Goldbogen, J. A., Cade, D. E., Wisniewska, D. M., Potvin, J., Segre, P. S., Savoca, M. S., Hazen, E. L., Czapanskiy, M. F., Kahane-Rapport, S. R., DeRuiter, S. K. et al.** (2019). Why whales are big but not bigger: physiological drivers and ecological limits in the age of ocean giants. *Science* **366**, 1367–1372. doi:10.1126/science.aax9044
- Gosline, J. and Shadwick, R. E.** (1996). The mechanical properties of fin whale arteries are explained by novel connective tissue designs. *J. Exp. Biol.* **199**, 985–987.
- Kimura, T.** (2002). Feeding strategy of an early Miocene cetothere from the Toyama and Akeyo Formations, central Japan. *Paleontol. Res.* **6**, 179–189.
- Lambertsen, R. L.** (1983). Internal mechanism of rorqual feeding. *J. Mar. Biol. Ass. U.K.* **64**, 76–88. doi:10.2307/1380752
- Lambertsen, R. H. and Hintz, R. J.** (2004). Maxillomandibular cam articulation discovered in north Atlantic minke whale. *J. Mamm.* **85**, 446–452. doi:10.1644/03-MAMM-010
- Lambertsen, R. H., Hintz, R. J., Lancaster, W. C., Hiron, A., Kreiton, J., Moor, C.** (1989). Characterization of the functional morphology of the mouth of the bowhead whale, *Balaena mysticetus*, with special emphasis on the suction and filtration mechanisms. Report to the Department of Wildlife Management, Barrow, Alaska: North Slope Borough.
- Lambertsen, R. L., Ulrich, N. and Straley, J.** (1995). Frontomandibular stay of Balaenopteridae: a mechanism for momentum recapture during feeding. *J. Mamm.* **76**, 877–899. doi:10.2307/1380752
- Lillie, M. A., Piscitelli, M. A., Vogl, A. W., Gosline, J. M. and Shadwick, R. E.** (2013). Cardiovascular design in fin whales: high-stiffness arteries protect against adverse pressure gradients at depth. *J. Exp. Biol.* **216**, 2548–2563. doi:10.1242/jeb.081802
- Lillie, M. A., Vogl, A. W., Gil, K. N. and Shadwick, R. E.** (2017). Two levels of waviness are necessary to package the highly extensible nerves in rorqual whales. *Curr. Biol.* **27**, 673–679. doi:10.1016/j.cub.2017.01.007
- Marx, F. G., Lambert, O. and Uhen, M.** (2016). *Cetacean Paleobiology*. London: Wiley-Blackwell.
- Orton, L. S. and Brodie, P. F.** (1987). Engulfing mechanics of fin whales. *Can. J. Zool.* **65**, 2898–2907. doi:10.1139/z87-440
- Pivoruska, A.** (1977). The fibrocartilage skeleton and related structures of the ventral pouch of balaenopterid whales. *J. Morph.* **151**, 299–310. doi:10.1002/jmor.1051510207
- Potvin, J., Goldbogen, J. A. and Shadwick, R. E.** (2010). Scaling of lunge feeding in rorqual whales: an integrated model of engulfment duration. *J. Theor. Biol.* **267**, 437–453. doi:10.1016/j.jtbi.2010.07.026
- Pyenson, N. D., Goldbogen, J. A., Vogl, A. W., Segre, P. S., Drake, R. L. and Shadwick, R. E.** (2012). Discovery of a sensory organ that coordinates lunge feeding in rorqual whales. *Nat.* **485**, 498–501. doi:10.1038/nature11135
- Shadwick, R. E.** (1999). Mechanical design in arteries. *J. Exp. Biol.* **202**, 3305–3313.
- Shadwick, R. E., Goldbogen, J. A., Potvin, J., Pyenson, N. D. and Vogl, A. W.** (2013). Novel muscle and connective tissue design enables high extensibility and controls engulfment volume in lunge-feeding rorqual whales. *J. Exp. Biol.* **216**, 2691–2701. doi:10.1242/jeb.081752
- Schulte, H. P.** (1916). Anatomy of a foetus of *Balaenoptera borealis*. Monographs of Pacific Cetacea. *Mem. Am. Mus. Nat. Hist.* **1**, 389–502.
- Simon, M., Johnson, M. and Jensen, P. T.** (2012). Keeping momentum with a mouthful of water: behavior and kinematics of humpback whale lunge feeding. *J. Exp. Biol.* **215**, 3786–3798. doi:10.1242/jeb.071092
- Tewissen, J. G. M.** (2014). *The Walking Whales*. Berkeley: Univ. of California Press.
- Vogel, A. W., Lillie, M. A., Piscitelli, M. S., Goldbogen, J. A., Pyenson, N. D. and Shadwick, R. E.** (2015). Stretchy nerves: essential components of an extreme feeding mechanism in rorqual whales. *Curr. Biol.* **25**, 360–361. doi:10.1016/j.cub.2015.03.001
- Werth, A. J. and Ito, H.** (2017). Sling, scoop, and squirter: anatomical features for prey transport, processing, and swallowing in rorqual whales (Mammalia: Mysticeti). *Anat. Rec.* **300**, 2070–2086. doi:10.1002/ar.23606
- Werth, A. J., Lillie, M. A., Piscitelli, M. S., Vogl, A. W. and Shadwick, R. E.** (2019). Slick, stretchy fascia underlies the sliding tongue of rorquals. *Anat. Rec.* **302**, 735–744. doi:10.1002/ar.24035
- Werth, A. J., Potvin, J., Shadwick, R. E., Jensen, M. M., Cade, D. E. and Goldbogen, J. A.** (2018a). Filtration area scaling and evolution in mysticetes: trophic niche partitioning and the curious cases of sei and pygmy right whales. *Biol. J. Linn. Soc.* **125**, 264–279. doi:10.1093/biolinnean/bly121
- Werth, A. J., Rita, D., Rosario, M. V., Moore, M. J. and Sformo, T. L.** (2018b). How do baleen whales stow their filter? A comparative biomechanical analysis of baleen bending. *J. Exp. Biol.* **221**, 1–9. doi:10.1242/jeb.189233
